# Supplementary material for: What Predicts Stable Mental Health in the 18–29 Age Group Compared to Older Age Groups? Results from the Stockholm Public Health Cohort 2002–2014
Source: MDPI journal article supplement (doi:10.3390/ijerph15122859), 2018-12-14
Supplement: s1 [file s1]

**Supplementary Materials, Table S2.** Potential determinants of health, survey items, response alternatives, categorization, and comments.

| Presumptive determinants of health | Survey items                                                                                                         | Response alternatives                                                                                                                                                                   | Categorization                                                                                                                                                                                                       | Comments                                                                                                                                                                                                              |
|------------------------------------|----------------------------------------------------------------------------------------------------------------------|-----------------------------------------------------------------------------------------------------------------------------------------------------------------------------------------|----------------------------------------------------------------------------------------------------------------------------------------------------------------------------------------------------------------------|-----------------------------------------------------------------------------------------------------------------------------------------------------------------------------------------------------------------------|
| <b>Sociodemographic factors</b>    |                                                                                                                      |                                                                                                                                                                                         |                                                                                                                                                                                                                      |                                                                                                                                                                                                                       |
| <b>Gender</b>                      | ----                                                                                                                 | ----                                                                                                                                                                                    | 1 Male<br>2 Female [Reference]                                                                                                                                                                                       | Register data. Obtained from Statistics Sweden ( <a href="http://www.scb.se">http://www.scb.se</a> ).                                                                                                                 |
| <b>Country of birth</b>            | ----                                                                                                                 | ----                                                                                                                                                                                    | 1 Sweden<br>2 Other Nordic countries<br>3 Other Europe<br>4 Outside Europe [Reference]                                                                                                                               | Register data. Obtained by linkage with the Longitudinal Integration Database for Health Insurance and Labour Market Studies (LISA), held by Statistics Sweden ( <a href="http://www.scb.se">http://www.scb.se</a> ). |
| <b>Housing</b>                     | In what type of housing do you live?                                                                                 | 1 Own house or terrace house<br>2 Tenant-owned (flat or terrace house)<br>3 Rental<br>4 Lodger/dormitory<br>5 Other type of housing                                                     | 1 Own = Own house/terrace house/Tenant-owned<br>2 Rental<br>3 Other = Lodger/dormitory + Other type of housing [Reference]                                                                                           |                                                                                                                                                                                                                       |
| <b>Occupational status</b>         | Which of the following alternatives apply to you right now?                                                          | 1 Employment<br>2 Own business<br>3 Disability pensioner<br>4 Old age or contractual pensioner<br>5 Leave of absence or parental leave,<br>6 Student/trainee<br>7 Unemployed<br>8 Other | 1 Employment<br>2 Own business<br>3 Student/trainee<br>4 Leave of absence or parental leave<br>5 Outside labour-market = Disability pensioner + Old age or contractual pensioner + Other<br>6 Unemployed [Reference] |                                                                                                                                                                                                                       |
| <b>Economic strain</b>             | A Has it happened during the past 12 months that you had to borrow money from relatives or friends to manage current | 1 No<br>2 Yes, once<br>3 Yes, several times                                                                                                                                             | 1 No financial strain<br>2 Some financial strain<br>3 Major financial strain [Reference]                                                                                                                             | A merging of item A and B                                                                                                                                                                                             |

|                                      |                                                                                                                                                                                                                                        |                                                                                                                                                                            |                                                                                                                                                     |                                                                                                   |
|--------------------------------------|----------------------------------------------------------------------------------------------------------------------------------------------------------------------------------------------------------------------------------------|----------------------------------------------------------------------------------------------------------------------------------------------------------------------------|-----------------------------------------------------------------------------------------------------------------------------------------------------|---------------------------------------------------------------------------------------------------|
|                                      | <p>expenditures for food and rent?</p> <p>B Have you, in the past 12 months refrained from going to the dentist, medical services or picking up prescriptions as a result of poor finances? Several alternatives may be indicated.</p> | <p>1 No</p> <p>2 Yes, the dentist due to poor finances</p> <p>3 Yes, medical services due to poor finances</p> <p>4 Yes, picking up prescriptions due to poor finances</p> | <p>1 No economic strain</p> <p>2 Some economic strain ( 1 Yes- alternative)</p> <p>3 Major economic strain (2 or 3 Yes-alternative) [Reference]</p> |                                                                                                   |
| <b>Support, Trust, Participation</b> |                                                                                                                                                                                                                                        |                                                                                                                                                                            |                                                                                                                                                     |                                                                                                   |
| <b>Emotional support</b>             | Do you know any people who can provide you with personal support for personal problems or crises in your life?                                                                                                                         | <p>1 Yes, always</p> <p>2 Yes, most of the time</p> <p>3 No, mostly not</p> <p>4 No, never</p>                                                                             | <p>1 High =Yes, always</p> <p>2 Moderate = Yes, most of the time</p> <p>3 Low = No, mostly not + No, never [Reference]</p>                          |                                                                                                   |
| <b>Instrumental support</b>          | Can you get help from another person/other persons if you have practical problems or are ill?                                                                                                                                          | <p>1 Yes, always</p> <p>2 Yes, most of the time</p> <p>3 No, mostly not</p> <p>4 No, never</p>                                                                             | <p>1 High =Yes, always</p> <p>2 Moderate = Yes, most of the time</p> <p>3 Low = No, mostly not + No, never [Reference]</p>                          |                                                                                                   |
| <b>Interpersonal trust</b>           | How well do you think the following statement describes the place where you live? You can trust most of the people living in your neighbourhood?                                                                                       | <p>1 Very accurate</p> <p>2 Fairly accurate</p> <p>3 Not particularly accurate</p> <p>4 Not at all</p>                                                                     | <p>1 Strong = Very accurate</p> <p>2 Fair = Fairly accurate</p> <p>3 Weak = Not particularly accurate + Not at all [Reference]</p>                  |                                                                                                   |
| <b>Community trust</b>               | How much confidence do you have in the following public institutions?                                                                                                                                                                  | <p>1 Considerable</p> <p>2 Fairly considerable</p> <p>3 Little</p> <p>4 None whatsoever</p>                                                                                | <p>Strong = Considerable</p> <p>Fair = Fairly considerable</p> <p>Weak = Little +None whatsoever [Reference]</p>                                    | <p>Summary variable categorized. Maximum points: 36.</p> <p>1 – 24 Strong</p> <p>25 – 27 Fair</p> |

|                                             |                                                                                                                                                                                                                                                           |                                                                                                      |                                                                                                                                         |                                                                                                      |
|---------------------------------------------|-----------------------------------------------------------------------------------------------------------------------------------------------------------------------------------------------------------------------------------------------------------|------------------------------------------------------------------------------------------------------|-----------------------------------------------------------------------------------------------------------------------------------------|------------------------------------------------------------------------------------------------------|
|                                             | a) Medical services<br>b) Social services<br>c ) The National insurance office<br>d) The Official employment services<br>e) The Police<br>f) The Parliament<br>g) The Government<br>h) Politicians in your region<br>i) Polititicians in yor municipality |                                                                                                      |                                                                                                                                         | 28 – 36 Weak [Reference]                                                                             |
| <b>Societal participation</b>               | In the past 12 months, have you more or less regularly participated in activities together with several other people? For example sport, music/theatre, courses, religious gatherings, choir, sewing groups, political associations or other society.     | 1 Yes<br>2 No                                                                                        | 1 Yes<br>2 No [Reference]                                                                                                               |                                                                                                      |
| <b>Voting</b>                               | Did you vote in any election in 2002? That is parliamentary, county health authority or municipal elections.                                                                                                                                              | 1Yes<br>2 No                                                                                         | 1Yes<br>2 No [Reference]                                                                                                                |                                                                                                      |
| <b>Healthy diet, Physical activity</b>      |                                                                                                                                                                                                                                                           |                                                                                                      |                                                                                                                                         |                                                                                                      |
| <b>Nutrition – consumption of breakfast</b> | How often do you eat breakfast?                                                                                                                                                                                                                           | 1 = Daily or almost daily<br>2= 3-5 times per week<br>3= Once – twice per week<br>4= Seldom or never | 1 Daily = Daily or almost daily<br>2 Several times a week = 3-5 times per week + Once – twice per week<br>3 Seldom or never [Reference] | Consumption of breakfast and fruit and Berries should be seen as proxies for healthy diet due to the |

|                                                     |                                                                                                                                                                    |                                                                                                                                                                                                                                                                  |                                                                                                                                                                                                                                                                                          |                                          |
|-----------------------------------------------------|--------------------------------------------------------------------------------------------------------------------------------------------------------------------|------------------------------------------------------------------------------------------------------------------------------------------------------------------------------------------------------------------------------------------------------------------|------------------------------------------------------------------------------------------------------------------------------------------------------------------------------------------------------------------------------------------------------------------------------------------|------------------------------------------|
|                                                     |                                                                                                                                                                    |                                                                                                                                                                                                                                                                  |                                                                                                                                                                                                                                                                                          | unavailability of other diet items 2002. |
| <b>Nutrition – consumption of fruit and berries</b> | How often do you eat Fruit and berries (an apple, an orange, a banana, a glass of juice, grapes, strawberries)                                                     | 1= Several times a day<br>2 =Daily<br>3= A few times a week<br>4= Once a week<br>5=1-3 times per month<br>6= Never or nearly never                                                                                                                               | 1 Daily = Several times a day + Daily<br>2 Several times a week<br>=A few times a week + Once a week<br>3 Seldom = 1-3 times per month + Never or nearly never [Reference]                                                                                                               |                                          |
| <b>Physical activity</b>                            | State your physical exercise in your leisure time during the last 12 months. The level may vary over the course of the year or a week, but try to give an average. | 1 Regular = On average 3 times per week at least 30 minutes<br>2 Moderate, regularly = Once-twice per week, at 30 minutes, sweating<br>3 Moderate = At least 2 hours per week, usually without sweating<br>4 Sedentary leisure time = Less than 2 hours per week | 1 Regular<br>2 Moderate = Moderate regularly + Moderate<br>3 Sedentary [Reference]                                                                                                                                                                                                       |                                          |
| <b>Alcohol, Gambling, Smoking</b>                   |                                                                                                                                                                    |                                                                                                                                                                                                                                                                  |                                                                                                                                                                                                                                                                                          |                                          |
| <b>Hazardous alcohol consumption</b>                | What are your alcohol habits during a typical week? Try to state an average.                                                                                       | A table including week-days Monday – Sunday and the number of drinks for spirit, fortified wine, wine, strong cider/alcopop, strong beer, and medium strong beer is to be filled in.                                                                             | Gram pure alcohol per week, computed by Statistics Sweden.<br>>108 g per week for women (approx. 9 standard glasses)<br>> 168 g per week for men (approx. 14 standard glasses).<br>1 = no risk <108 g and < 168 g, respectively<br>2 = risk >108 g and > 168 g, respectively [Reference] |                                          |
| <b>Tobacco smoking</b>                              | Do you smoke daily i.e. cigarettes, pipe, cigars and/or cigarillos?                                                                                                | 1 No<br>2 Yes                                                                                                                                                                                                                                                    | 1 No<br>2 Yes [Reference]                                                                                                                                                                                                                                                                |                                          |
| <b>Violations</b>                                   |                                                                                                                                                                    |                                                                                                                                                                                                                                                                  |                                                                                                                                                                                                                                                                                          |                                          |
| <b>Physical violence</b>                            | Have you during the past 12 months been a victim of                                                                                                                | 1 No<br>2 Yes                                                                                                                                                                                                                                                    | 1= Not subject to a threat of violence or physical violence                                                                                                                                                                                                                              |                                          |

|                           |                                                                                                                                               |               |                                                                                                                                                     |
|---------------------------|-----------------------------------------------------------------------------------------------------------------------------------------------|---------------|-----------------------------------------------------------------------------------------------------------------------------------------------------|
|                           | physical violence?                                                                                                                            |               | 2= Subject to threat of violence<br>3= Victim of physical violence<br>4= Subject to threat of violence and victim of physical violence. [Reference] |
| <b>Threat of violence</b> | Have you at any point in time in the past 12 months been subject to a threat of violence so intimidating or serious that you were frightened? | 1 No<br>2 Yes |                                                                                                                                                     |
